# Supplementary material for: A highly sensitive method for time-resolved detection of O(1D) applied to precise determination of absolute O(1D) reaction rate constants and O(3P) yields
Source: Royal Society of Chemistry journal article supplement (doi:10.1039/b513576c), 2005-01-01
Supplement: b513576c-esi.pdf [file b513576c-esi.pdf]

## Supplementary material (ESI)

for

### “A Highly Sensitive Method for Time-Resolved Detection of O(<sup>1</sup>D) Applied to Precise Determination of Absolute O(<sup>1</sup>D) Reaction Rate Constants and O(<sup>3</sup>P) yields”

Shaun Avondale Carl

The CH(A<sup>2</sup>Δ) quasi-steady-state concentration, [CH(A<sup>2</sup>Δ)]<sub>ss</sub>, and hence the CH(A<sup>2</sup>Δ→X<sup>2</sup>Π) emission intensity at 431 nm,  $I_{em}$ , are proportional to the ratio of the [CH(A<sup>2</sup>Δ)] formation and removal rates. Thus the general equation is:

$$I_{em} \propto [CH(A^2\Delta)]_{ss} = B[C_2H] \left( [O(^1D_2)] + \frac{[O(^3P_J)]}{3.0} \right) \quad (i)$$

Here,  $B = k_{chem}/\{A_{nm} + \sum_i(kI_{bXi}[X_i] + kI_{bR}[R])\}$ , where the denominator is the sum of quenching rate constants for CH(A<sup>2</sup>Δ),  $kI_{bXi}$  and  $kI_{bR}$ , by species [X<sub>i</sub>] and [R], respectively, and the Einstein coefficient,  $A_{nm}$ , for spontaneous emission for CH(A<sup>2</sup>Δ → X<sup>2</sup>Π). [X<sub>i</sub>] represents the concentrations of the photolytic precursors for O(<sup>1</sup>D) and C<sub>2</sub>H, and that of the buffer gas, [He], whereas [R] represents the concentration of any added reactant. [X<sub>i</sub>] and [R] are treated separately because the kinetic effects of [X<sub>i</sub>] remain essentially constant, even though [He] is altered slightly to compensate for added [R].

The temporal profile of the CH(A→X) emission depends on the time dependences of [O(<sup>1</sup>D<sub>2</sub>)], [C<sub>2</sub>H], and [O(<sup>3</sup>P<sub>J</sub>)], governed by:

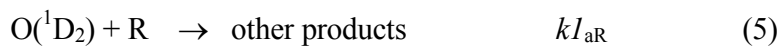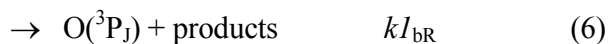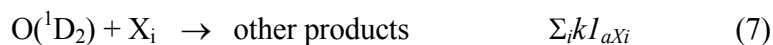

This journal is © the Owner Societies 2005.

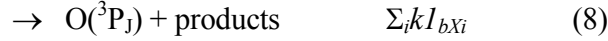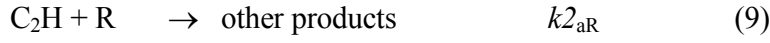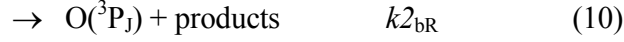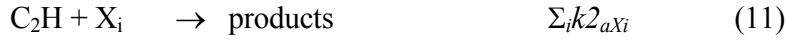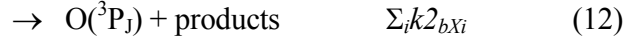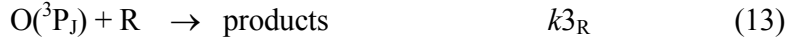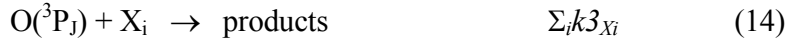

Therefore,  $[O(^1D_2)]_t = [O(^1D_2)]_0 \exp(-k_1 t)$  and  $[C_2H]_t = [C_2H]_0 \exp(-k_2 t)$  where  $k_{\delta'} = k_{\delta aR}[R] + k_{\delta bR}[R] + \Sigma_i ((k_{\delta aXi} + k_{\delta bXi})[X_i])$ , with  $\delta = 1$  or  $2$ , and

$$\frac{d[O(^3P_J)]}{dt} = [O(^1D_2)]_t k_{1b'} + [C_2H]_t k_{2b'} - [O(^3P_J)]_t k_{3'} \quad (ii)$$

Where the total removal rate of  $O(^3P_J)$ ,  $k_{3'} = k_{3R}[R] + \Sigma_i (k_{3Xi}[X_i])$ , giving

$$[O(^3P_J)] = \left\{ \frac{k_{1b'}}{k_{1'} - k_{3'}} \right\} [O(^1D_2)]_0 (\exp(-k_{3'} t) - \exp(-k_{1'} t)) + \left\{ \frac{k_{2b'}}{k_{2'} - k_{3'}} \right\} [C_2H]_0 (\exp(-k_{3'} t) - \exp(-k_{2'} t)) \quad (iii)$$

This leads to the full expression for  $I_{em}$  of

$$I_{em} \propto B[C_2H]_0 [O(^1D_2)]_0 \left\{ \exp(-(k_{1'} + k_{2'}) t) + \left\{ \frac{1}{3.0} \right\} \left\{ \frac{k_{1b'}}{k_{1'} - k_{3'}} \right\} \left\{ \exp(-(k_{3'} + k_{2'}) t) - \exp(-(k_{1'} + k_{2'}) t) \right\} \right\} \\ + B[C_2H]_0^2 \left\{ \left\{ \frac{1}{3.0} \right\} \left\{ \frac{k_{2b'}}{k_{2'} - k_{3'}} \right\} \left\{ \exp(-(k_{3'} + k_{2'}) t) - \exp(-2k_{2'} t) \right\} \right\} \quad (iv)$$

Two simplifications can be applied leading to a function having only two unknown parameters,  $k_{1Ra}$  and  $k_{1R}$  ( $= k_{1Ra} + k_{1Rb}$ ). The first is to recognise the general great disparity in the magnitude of rate constants for reactions involving, on the one hand,  $O(^1D_2)$  and  $C_2H$ , and, on the other,  $O(^3P_J)$  with neutral, stable molecules. This leads to elimination of

This journal is © the Owner Societies 2005.

$k3'$  from equation (iv). The second concerns the low yield of  $O(^3P_J)$  generated by reactions of  $C_2H$ .  $O(^3P_J)$  cannot be generated efficiently from the  $C_2H + N_2O$  reaction because the *overall* rate constant is low at room temperature and below. If this holds also for R – either because it is void of O-atoms, the rate of reaction of R with  $C_2H$  is low, or the branching fraction to  $O(^3P_J)$  for  $R + C_2H$  is negligible – then the second term of equation (iv) may be neglected, because,  $[O^1D_2]_0(kI_b'/kI') \gg [C_2H]_0(k2_b'/k2')$  – assuming  $[O^1D_2]_0$  is of the same order as, or greater than,  $[C_2H]_0$ .

To a very good approximation,

$$I_{em} \propto B[C_2H]_0 [O(^1D)]_0 \left\{ \exp(-(k1'+k2')t) + \left\{ \frac{1}{3.0} \right\} \left\{ \frac{k1_b'}{k1'} \right\} \left\{ \exp(-k2't) - \exp(-(k1'+k2')t) \right\} \right\} \quad (v)$$

Thus at long times, the decay rate is that of  $[C_2H]$ , given by  $A(kI_b'/3kI')\exp(-k2't)$ , where  $A$  is a constant.

In order to determine the values  $kI_{aR}$  and  $kI_R$ , the following procedure may be followed. A chemiluminescence profile is recorded in the presence of  $N_2O$ ,  $C_2H_2$ , and He only. Fitting equation (v) to this profile gives the values for  $kI'$ ,  $k2'$ ,  $kI_b'/kI'$  (*i.e.*, their values when  $[R] = 0$ ) and  $A$ . In cases when  $kI_b'/kI'$  is less than about 0.03, a second decay is recorded under conditions in which a small fraction of  $[He]$  is replaced by either  $[Ar]$  or  $[N_2]$ . This promotes quenching of  $O(^1D_2)$ , and therefore increases the intensity of the long-time portion of the decay, and in turn increases the precision to which  $k2'$  is known. Thus  $k2'$  may be determined from the second profile while  $kI'$  and  $kI_b'$  are always determined from the first.

Once these parameters are known,  $[R]$  may be added and equation (v) fit to the new profile, with the only unknown parameters now being  $kI_{bR}$ ,  $kI_R$ , and  $(k2_{aR} + k2_{bR})$ . Again  $(k2_{aR} + k2_{bR})$  may be determined more precisely, if required, by replacement of a small fraction of  $[He]$  by  $[N_2]$ . In practice, several sets of decay profiles are taken with different  $[R]$  to determine the values of the desired parameters. If  $kI_{bR} \ll kI_{aR}$  these parameters are not strongly coupled, since  $kI_{bR}$  affects the long-time *intensity* of the decay profile, whilst  $kI_{aR}$  affects its initial *slope*.

This journal is © the Owner Societies 2005.
